# Supplementary material
Source: MDPI journal article supplement (https://www.mdpi.com/2071-1050/14/19/11805)
Supplement: s1 [file s1]

To: The Editors of the journal of Sustainability, EISSN 2071-1050, published by MDPI

Subject: Consent to publish case-study based article on Elvis and Kresse

Date: 23 August 2022

This is to confirm that Maria Fernanda Ortiz Dominguez & Yasser Bhatti approached me in the process of researching and drafting the article titled "*From Waste to Luxury Fashion at Elvis & Kresse: A Business Model for Sustainable and Social Innovation in the Circular Economy*". As co-founder of *Elvis & Kresse*, I have reviewed the article, offered feedback, and confirm the article provides a factual picture of my company without infringing on any confidential or copyrighted information. I consent for it to be published in *Sustainability*, EISSN 2071-1050, by MDPI.

With kind regards

A handwritten signature in black ink, appearing to read 'KAG Wt' with a stylized flourish at the end.

Kresse Wesling CBE

Elvis & Kresse  
New Barns Farm  
Box Lane, Painters Forstal  
ME13 0RU, Kent, United Kingdom  
Tel: +44 1795 892 184  
[www.elvisandkresse.com](http://www.elvisandkresse.com)
